# Supplementary material
Source: PubMed Central journal article supplement (PMC3431649)
Supplement: supp_C112.360800_jbc.C112.360800-1.pdf [file supp_C112.360800_jbc.C112.360800-1.pdf]

## Supplemental Material

### Human serum albumin can regulate amyloid-beta fiber growth in the brain interstitium. Implications for Alzheimer's Disease

Helen F. Stanyon and John H. Viles\*

#### Including:

#### Affinity Calculations:

**Supplemental Figure 1.** A $\beta$ (1-40) fibril growth in the presence of HSA.

**Supplemental Figure 2 :** Kinetic parameters for mean fibril growth of A $\beta$ (1-42) in the presence of varying concentrations of HSA.

#### Affinity Calculations:

The albumin-A $\beta$  complex is in equilibrium with free A $\beta$  with a dissociation constant of 5  $\mu$ M.

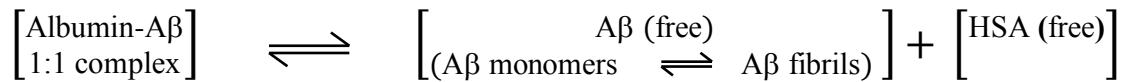

$$K_d = \frac{[\text{HSA free}] \left[ \begin{array}{c} \text{A}\beta \text{ free} \\ \text{(monomeric or fibrillar)} \end{array} \right]}{[\text{HSA-A}\beta \text{ complex}]}$$

This can be rewritten as:

$$K_d = \frac{([\text{Total HSA}] - [\text{Bound HSA}])([\text{Total A}\beta] - [\text{Bound A}\beta])}{[\text{Bound HSA-A}\beta]}$$

As the bound concentration is unknown, this becomes x:

$$K_d = \frac{([\text{Total HSA}] - x)([\text{Total A}\beta] - x)}{x}$$

When the appropriate values are submitted within the above equation, a quadratic equation is produced. Therefore, x is solved using the following equation:

$$x = \frac{-b \pm \sqrt{b^2 - 4ac}}{2a}$$

The  $K_d$  for the complex is 5  $\mu$ M.

Predicted percentage of A $\beta$  bound to HSA with different concentrations of albumin can be calculated as follows:

For total A $\beta$  concentration of 10  $\mu$ M and total HSA concentration of 10  $\mu$ M.:

$$5 \mu\text{M} = \frac{(10 \mu\text{M} - x)(10 \mu\text{M} - x)}{x}$$

$$5x = x^2 - 20x + 100$$

$$x^2 - 25x + 100 = 0$$

$$x = \frac{25 \pm \sqrt{25^2 - (4 \times 1 \times 100)}}{2 \times 1}$$

$$x = 5, x = 20.$$

However, as the concentration bound must be lower than the total concentration, so  $x = 5 \mu\text{M}$ .

$$\% \text{A}\beta_{\text{bound}} = \frac{5 \mu\text{M} \times 100}{10 \mu\text{M}} = 50 \%$$

A similar calculation can be carried out for 5, 3 and 1  $\mu$ M total HSA. The proportion of free and HSA bound A $\beta$  is calculated based upon a  $K_d$  of 5  $\mu$ M and is tabulated below.

| Total HSA ( $\mu$ M) | A $\beta$ Bound to HSA ( $\mu$ M) | A $\beta$ Free ( $\mu$ M) | A $\beta$ Free (%) |
|----------------------|-----------------------------------|---------------------------|--------------------|
| 10                   | 5.00                              | 5.00                      | 50.0               |
| 5                    | 2.93                              | 7.07                      | 70.7               |
| 3                    | 1.86                              | 8.14                      | 81.4               |
| 1                    | 0.65                              | 9.35                      | 93.5               |

These values are correlated with percentage fraction of A $\beta$  fibers generated in the presence of increasing levels of albumin in Figure 3b.

Similarly, the predicted percentage of A $\beta$  bound to HSA in the CSF based on a  $K_d$  of 5  $\mu$ M with HSA concentration of 3  $\mu$ M and A $\beta$  levels of 1 nM can be calculated, giving the result that 37.5 % of A $\beta$  will be bound to HSA in the CSF.

$$5 \mu\text{M} = \frac{(3 \mu\text{M} - x)(0.001 \mu\text{M} - x)}{x}$$

$$5x = x^2 - 3.001x + 0.003$$

$$x^2 - 8.001x + 0.003 = 0$$

$$x = \frac{8.001 \pm \sqrt{8.001^2 - (4 \times 1 \times 0.003)}}{2 \times 1}$$

$$x = 0.375, x = 7.997$$

However, as the concentration bound must be lower than the total concentration,  $x = 0.375 \mu\text{M}$ .

$$\% \text{A}\beta_{\text{bound}} = \frac{0.375 \mu\text{M} \times 100}{10 \mu\text{M}} = \mathbf{37.5 \%}$$

With a decrease in HSA concentration to  $1 \mu\text{M}$  and  $\text{A}\beta$  remaining at  $1 \text{ nM}$ , the percentage of  $\text{A}\beta$  bound to albumin will be only  $16.7 \%$ .

$$5 \mu\text{M} = \frac{(1 \mu\text{M} - x)(0.001 \mu\text{M} - x)}{x}$$

$$5x = x^2 - 1.001x + 0.001$$

$$x^2 - 6.001x + 0.001 = 0$$

$$x = \frac{6.001 \pm \sqrt{6.001^2 - (4 \times 1 \times 0.001)}}{2 \times 1}$$

$$x = 1.667 \times 10^{-4}, x = 6.001$$

As the concentration bound can't be higher than the total concentration,  $x = 0.167 \text{ nM}$ .

$$\% \text{A}\beta_{\text{bound}} = \frac{0.167 \text{ nM} \times 100}{1 \text{ nM}} = \mathbf{16.7 \%}$$

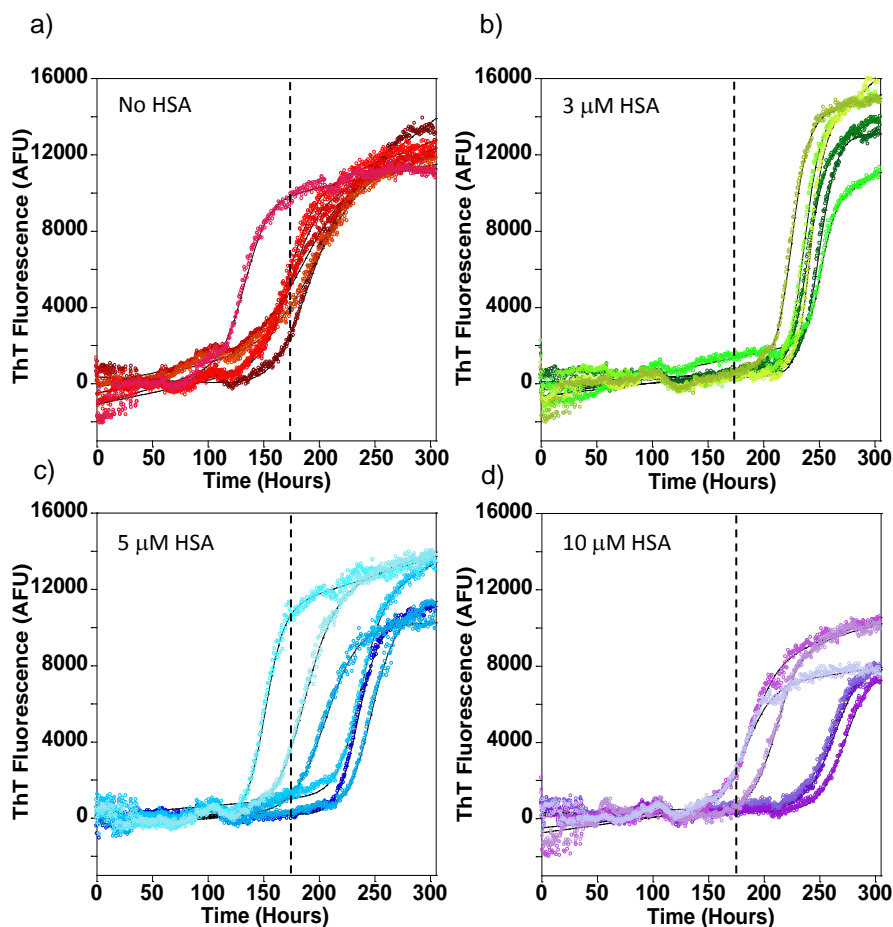

**Supplemental Figure 1. Aβ(1-40) fibril growth in the presence of HSA.  
(One of 4 repeat experiments)**

Fibrillisation of 10 μM Aβ(1-40) in 30 mM HEPES and 160 mM NaCl at pH 7.4 at 30 °C was monitored using ThT fluorescence. Here individual traces of Aβ alone (a) and Aβ in the presence of 3 μM (b), 5 μM (c) and 10 μM (d) HSA are shown. The average t<sub>50</sub> for Aβ alone is shown on traces a-d as a dashed line.

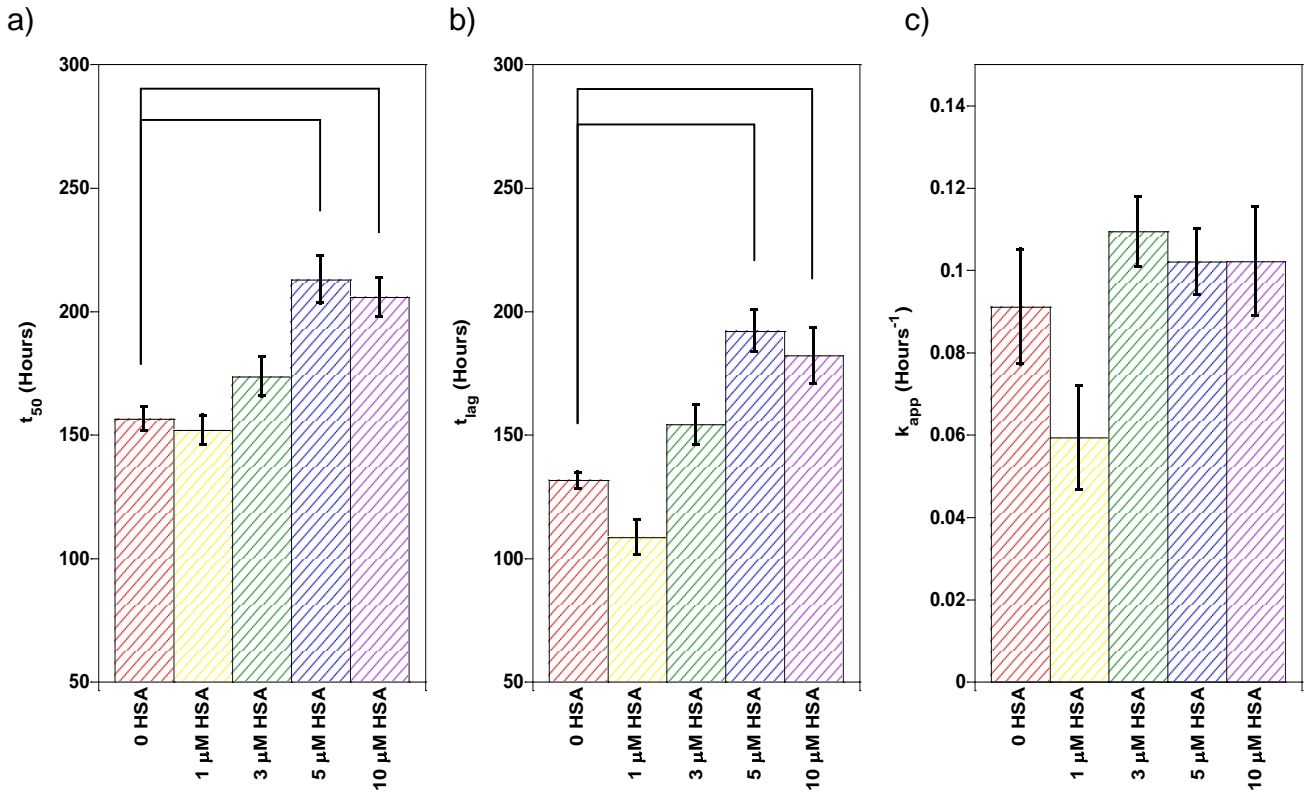

**Supplemental Figure 2 : Kinetic parameters for mean fibril growth of Aβ(1-42) in the presence of varying concentrations of HSA.**

Fibrillization of 10 μM Aβ(1-42) in 30 mM HEPES and 160 mM NaCl at pH 7.4 at 30 °C was monitored using ThT fluorescence. Here the t<sub>50</sub> (A), lag times (t<sub>lag</sub>) (B) and average apparent growth rates (k<sub>app</sub>) (C), with their standard errors are shown. Significant differences between Aβ alone and albumin concentrations are shown by connecting lines, typically observed for 5 and 10 μM HSA.
